# Supplementary material for: Charge-transport kinetics of dissolved redox-active polymers for rational design of flow batteries
Source: Royal Society of Chemistry journal article supplement (doi:10.1039/d2ra07208d), 2022-12-22
Supplement: d2ra07208d2.xlsx [file d2ra07208d2.xlsx]

## Sheet: Note
	Supporting Data
	Calculation example of average Dphys from DLS data
	In "Inaccurate approach" sheat, Dphys is estimated from average radius of particles.
	In "Correct approach" sheat, Dphys is estimated from Eq6.

## Sheet: Inaccurate approach
Original data			Processed data
			Average size (nm)
			8.7577
			Average Dphys (cm2/s)
			5.6036e-07
Size	Probability		Probability*Size
0.4	0		0
0.463	0		0
0.536	0		0
0.621	0		0
0.719	0		0
0.833	0		0
0.965	0		0
1.12	0		0
1.29	0		0
1.5	0		0
1.74	0		0
2.01	0		0
2.33	0		0
2.7	1.74		4.698
3.12	7.35		22.932
3.62	14.1		51.042
4.19	17.4		72.906
4.85	16.3		79.055
5.61	13		72.93
6.5	9.39		61.035
7.53	6.48		48.7944
8.72	4.44		38.7168
10.1	3.09		31.209
11.7	2.18		25.506
13.5	1.55		20.925
15.7	1.08		16.956
18.2	0.727		13.2314
21	0.469		9.849
24.4	0.286		6.9784
28.2	0.164		4.6248
32.7	0.0869		2.84163
37.8	0.0419		1.58382
43.8	0.0179		0.78402
50.7	0.00639		0.323973
58.8	0.00172		0.101136
68.1	0.000268		0.0182508
78.8	7.92e-06		0.000624096
91.3	0		0
106	0		0
122	0		0
142	0		0
164	0		0
190	0		0
220	0		0
255	0		0
295	0		0
342	0		0
396	0		0
459	0		0
531	0		0
615	0		0
712	0		0
825	0		0
955	0		0
1110	0		0
1280	3.98e-05		0.050944
1480	0.000256		0.37888
1720	0.000831		1.42932
1990	0.0019		3.781
2300	0.00361		8.303
2670	0.00592		15.8064
3090	0.00847		26.1723
3580	0.0107		38.306
4150	0.0123		51.045
4800	0.0133		63.84
5560	0.0103		57.268
6440	0.00347		22.3468
7460	0		0
8630	0		0

## Sheet: Correct approach
Original data			Processed data
					Average Dphys (cm2/s)
					9.96239e-07
Size	Probability		Dphys	log10(Dphys)	Probability*Dphys			Calculate constant c by Eq 5
0.4	0		1.22687e-05	-4.9112	0			kb	1.38065e-23
0.463	0		1.05993e-05	-4.97472	0			viscosity	0.89
0.536	0		9.15571e-06	-5.03831	0			T	298.15
0.621	0		7.90252e-06	-5.10223	0			c	4.90746e-06
0.719	0		6.8254e-06	-5.16587	0
0.833	0		5.89131e-06	-5.22979	0
0.965	0		5.08545e-06	-5.29367	0
1.12	0		4.38166e-06	-5.35836	0
1.29	0		3.80423e-06	-5.41973	0
1.5	0		3.27164e-06	-5.48523	0
1.74	0		2.82038e-06	-5.54969	0
2.01	0		2.44152e-06	-5.61234	0
2.33	0		2.10621e-06	-5.6765	0
2.7	1.74		1.81758e-06	-5.74051	3.16259e-06
3.12	7.35		1.5729e-06	-5.8033	1.15608e-05
3.62	14.1		1.35565e-06	-5.86785	1.91147e-05
4.19	17.4		1.17123e-06	-5.93136	2.03794e-05
4.85	16.3		1.01185e-06	-5.99488	1.64931e-05
5.61	13		8.7477e-07	-6.05811	1.1372e-05
6.5	9.39		7.54994e-07	-6.12206	7.0894e-06
7.53	6.48		6.51721e-07	-6.18594	4.22315e-06
8.72	4.44		5.62782e-07	-6.24966	2.49875e-06
10.1	3.09		4.85887e-07	-6.31346	1.50139e-06
11.7	2.18		4.19441e-07	-6.37733	9.14382e-07
13.5	1.55		3.63516e-07	-6.43948	5.63449e-07
15.7	1.08		3.12577e-07	-6.50504	3.37583e-07
18.2	0.727		2.69641e-07	-6.56921	1.96029e-07
21	0.469		2.33689e-07	-6.63136	1.096e-07
24.4	0.286		2.01125e-07	-6.69653	5.75219e-08
28.2	0.164		1.74023e-07	-6.75939	2.85399e-08
32.7	0.0869		1.50075e-07	-6.82369	1.30415e-08
37.8	0.0419		1.29827e-07	-6.88663	5.43975e-09
43.8	0.0179		1.12043e-07	-6.95062	2.00556e-09
50.7	0.00639		9.67941e-08	-7.01415	6.18514e-10
58.8	0.00172		8.34602e-08	-7.07852	1.43552e-10
68.1	0.000268		7.20626e-08	-7.14229	1.93128e-11
78.8	7.92e-06		6.22774e-08	-7.20567	4.93237e-13
91.3	0		5.3751e-08	-7.26961	0
106	0		4.62968e-08	-7.33445	0
122	0		4.02251e-08	-7.3955	0
142	0		3.45596e-08	-7.46143	0
164	0		2.99235e-08	-7.52399	0
190	0		2.58287e-08	-7.5879	0
220	0		2.23066e-08	-7.65157	0
255	0		1.92449e-08	-7.71568	0
295	0		1.66355e-08	-7.77897	0
342	0		1.43493e-08	-7.84317	0
396	0		1.23926e-08	-7.90684	0
459	0		1.06916e-08	-7.97096	0
531	0		9.24193e-09	-8.03424	0
615	0		7.97961e-09	-8.09802	0
712	0		6.8925e-09	-8.16162	0
825	0		5.94844e-09	-8.2256	0
955	0		5.1387e-09	-8.28915	0
1110	0		4.42114e-09	-8.35447	0
1280	3.98e-05		3.83395e-09	-8.41635	1.52591e-13
1480	0.000256		3.31585e-09	-8.4794	8.48858e-13
1720	0.000831		2.85318e-09	-8.54467	2.37099e-12
1990	0.0019		2.46606e-09	-8.608	4.68552e-12
2300	0.00361		2.13368e-09	-8.67087	7.70258e-12
2670	0.00592		1.838e-09	-8.73565	1.0881e-11
3090	0.00847		1.58818e-09	-8.7991	1.34518e-11
3580	0.0107		1.3708e-09	-8.86303	1.46676e-11
4150	0.0123		1.18252e-09	-8.92719	1.4545e-11
4800	0.0133		1.02239e-09	-8.99038	1.35978e-11
5560	0.0103		8.82637e-10	-9.05422	9.09116e-12
6440	0.00347		7.62028e-10	-9.11803	2.64424e-12
7460	0		6.57837e-10	-9.18188	0
8630	0		5.68651e-10	-9.24515	0
